# Supplementary material
Source: publisher site journal article supplement (https://www.dovepress.com/article/332387)
Supplement: Supplementary file 1 [file get_supplementary_file.php]

| Table S1: Primers and SiRNA sequences used in this research (5’-3’) | |
| --- | --- |
| Name | Sequence |
| AL512422.1 forward | 5′- CTTCCTCATTACAATCCCATAT-3′ |
| AL512422.1 reverse | 5′- CTGCTCGTCCCTTATCCA-3′ |
| AL008718.3 forward | 5′- GGGATTGGATAGTGAAGC-3′ |
| AL008718.3 reverse | 5′- GTGGGAAATGGTGAAGAG-3′ |
| AC006033.2 forward | 5′- AGGGAGAACCTTGTAATG-3′ |
| AC006033.2 reverse | 5′- AATAGCCAGACTGTGAGC-3′ |
| AL357507.1 forward | 5′- ACTGGCTTGAAAGATGAA-3′ |
| AL357507.1 reverse | 5′- TAATACCAATGGGAGGAA-3′ |
| AL360182.2 forward | 5′- CCACCCAGGAACGAGCAA-3′ |
| AL360182.2 reverse | 5′- GACACGCACGCACAAAGC-3′ |
| C5orf66-AS1 forward | 5′- CCTGCCAACACGCAAGACC-3′ |
| C5orf66-AS1 reverse | 5′- GCCCAGTTTCCCACCTGACT-3′ |
| CEBPA-DT forward | 5′- CCTGCCAACACGCAAGAC-3′ |
| CEBPA-DT reverse | 5′- TGCTGGTTCGCTACATCCC-3′ |
| GAPDH forward | 5′-AAGGTGAAGGTCGGAGTCAAC-3′ |
| GAPDH reverse | 5′-GGGGTCATTGATGGCAACAATA-3′ |
